# Supplementary material for: Selective extracellular vesicle exclusion of miR-142-3p by oral cancer cells promotes both internal and extracellular malignant phenotypes
Source: PubMed Central journal article supplement (PMC5362484; doi:10.18632/oncotarget.14862), 2017-01-27
Supplement: oncotarget-08-15252-s001.pdf [file oncotarget-08-15252-s001.pdf]

# Selective extracellular vesicle exclusion of miR-142-3p by oral cancer cells promotes both internal and extracellular malignant phenotypes

## Supplementary Materials

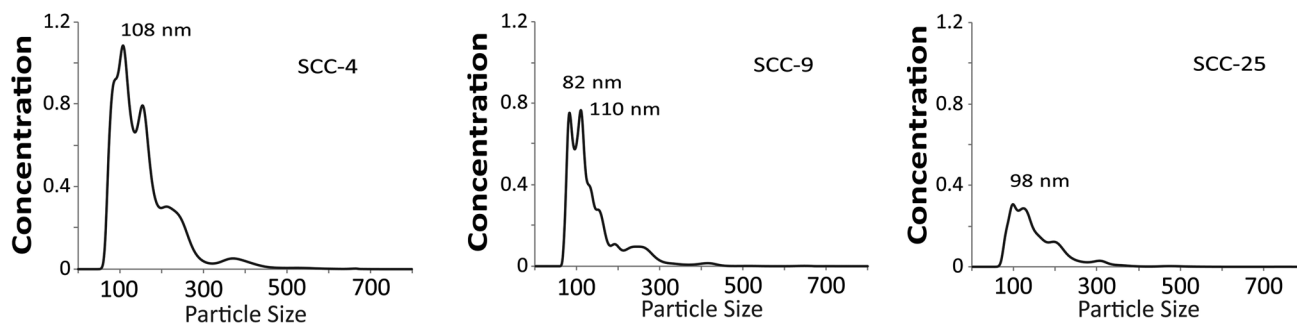

Supplementary Figure 1: NanoSight determined size distribution of particles obtained during SEV precipitation in SCC-4, SCC-9, and SCC-25 cells. Y axis denotes particles  $\times 10^9$  per ml and was normalized to 100,000 secreting cells.

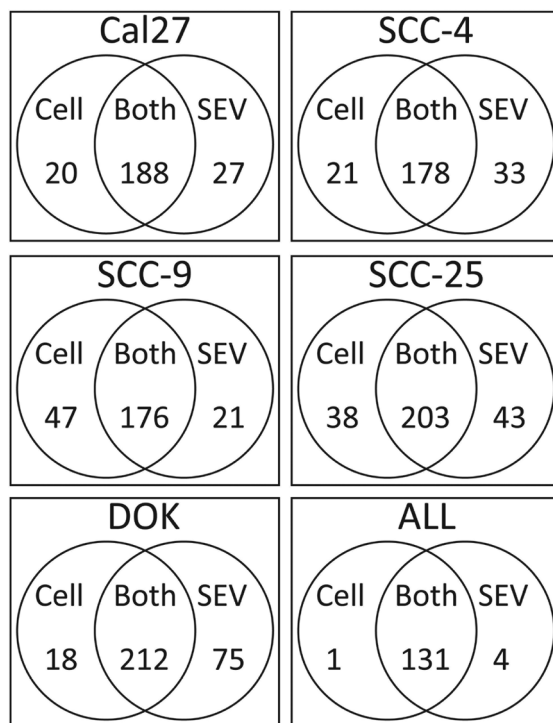

Supplementary Figure 2: Venn diagrams showing the number of miRNAs detected below a CT of 35, for each cell line by qRT-PCR, and what fraction the miRNAs were detected in.

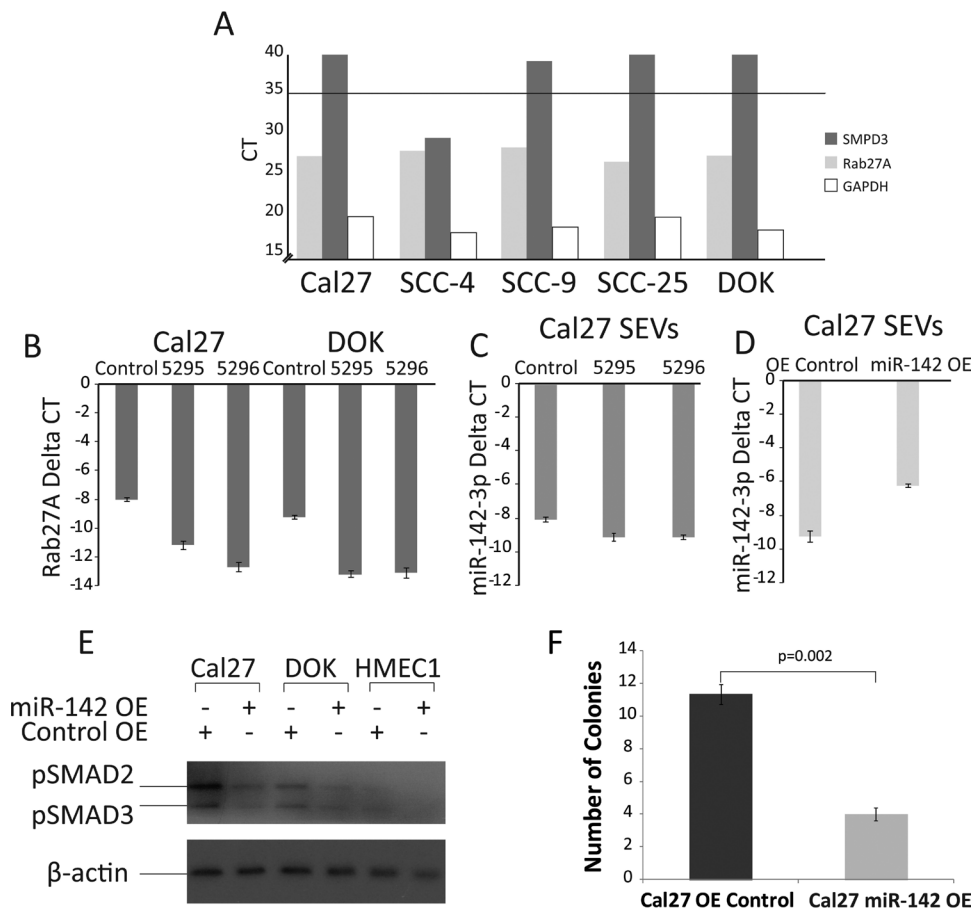

**Supplementary Figure 3: Analysis of knockdown and over-expression cells.** (A) shows qRT-PCR CT values of the endogenous quantities of the SMPD3 and Rab27A, The black line represents our threshold of detection above which there may be amplification in no template controls. (B) shows the knockdown efficiency of Rab27A shRNAs in Cal27 and DOK. GAPDH was used to normalize (C) The amount of miR-142-3p secreted from the cells after SEV release was inhibited by Rab27A, Equal volumes of RNA were loaded and normalized to cel-miR-39 spike-in. (D) shows the amount of miR-142-3p over-expression after lenti-infection in the SEVs collected from Cal27 cells. Error bars represent the standard deviation over three replicates spike-in cel-miR-39 was used to normalize. (E) Western blot of pSMAD2/3 on cell lines with miR-142-3p over-expression. (F) Colony formation assay, showing average number of colonies across three wells after 5 weeks, p values represent student's *t*-test and error bars represent standard deviation.

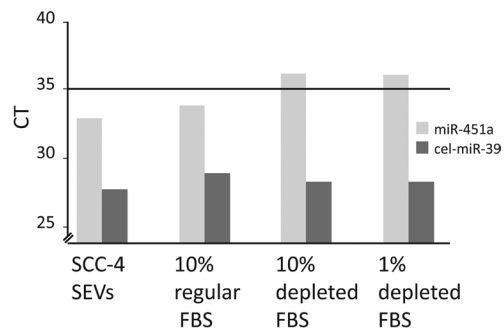

**Supplementary Figure 4: Effects of SEV depletion of FBS.** qRT-PCR results of RNA isolated from SCC-4 SEVs and blank media supplemented with 10% regular FBS, 10% depleted FBS or 1% depleted FBS. miR-451a was tested along with spike in cel-miR-39. The black bar represents the threshold of detection above which there may be no template control amplification. Equal volumes of miRNA were run using TaqMan qRT-PCR.

**Supplementary Table 1: miRNA expression data for cell lines and matched SEVs.** See Supplementary\_Table\_1

**Supplementary Table 2: miRNAs and the cellular or extracellular fraction they are detected in.** See Supplementary\_Table\_2
